# Supplementary material
Source: PubMed Central journal article supplement (PMC5399885)

**Figure S1.** Expression of OX1R and OX2R is unchanged following acute PA exposure. mHypoA-1/2 cells exposed to vehicle (C) or PA (0.1 mM) for 2h. Changes in gene expression was determined using qRT-PCR. The following sequences were used OX1R (NM\_198959) Forward: GCGATTATCTCTACCCGAAGC, Reverse: CAGGGACAGGTTGACAATG and OX2R (NM\_198962): Forward: AATCCCACGGACTATGACGACG, Reverse: GAGAGCCACAACGAACACGATG.

**Figure S2.** OXA pretreatment is necessary to increase Akt phosphorylation prior to simultaneously exposing mHypoA-1/2 neurons to PA and OXA. Using an in-cell ELISA, changes in phosphorylated Akt normalized to total Akt was determined following simultaneous exposure to OXA (300 nM), PA (0.1 mM), and/or vehicle (PBS/DMSO) control for 1 h. As expected, OXA significantly increases phosphorylated Akt ( $p < 0.05$  vs. C, PA, OXA+PA). When cells are exposed to OXA and PA simultaneously, phosphorylated Akt is not increased indicating 24 h pretreatment with OXA is necessary for optimal neuroprotection.

**A.**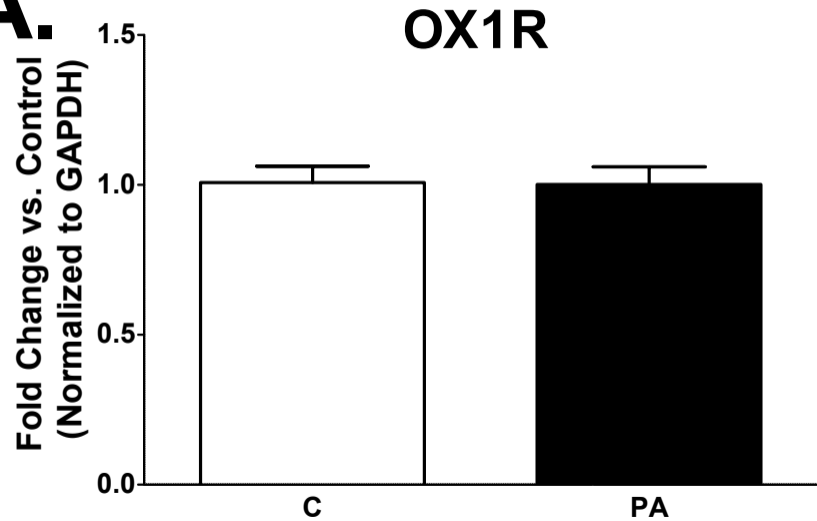**B.**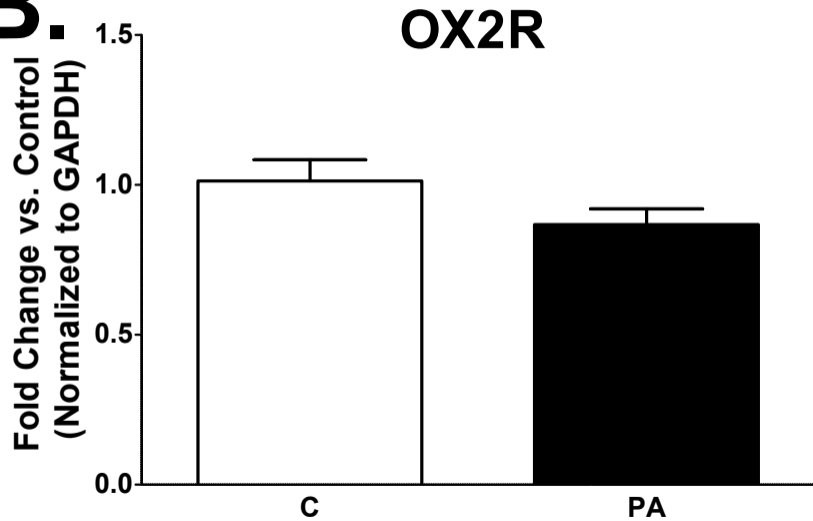

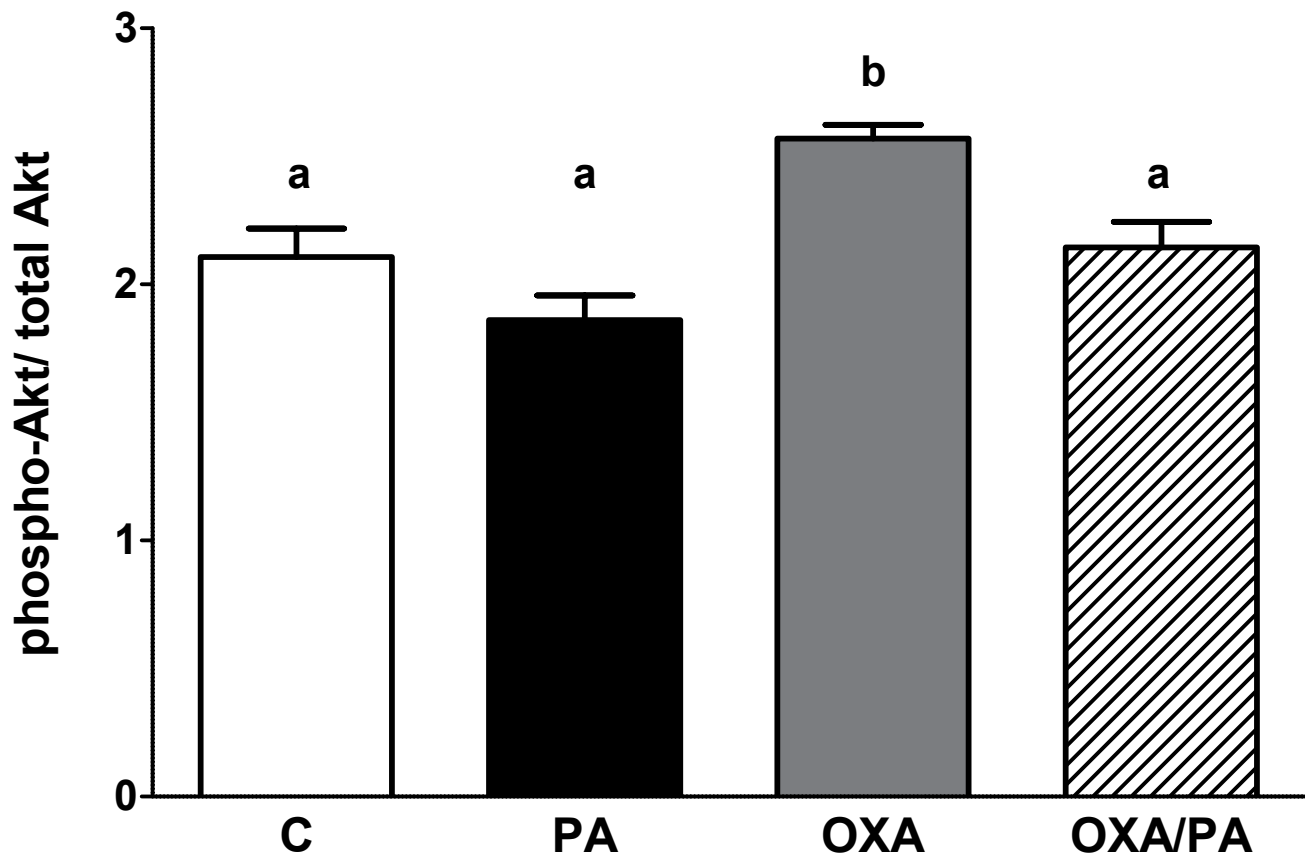

Supplement: NIHMS855986-supplement-Supplemental_Data.pdf [file NIHMS855986-supplement-Supplemental_Data.pdf]
